# Supplementary material
Source: publisher figshare collection journal article supplement (https://sage.figshare.com/ndownloader/files/13158602)
Supplement: Supplementary file 1 [file 13158602]

Highlights

- Modeling and experimental verification of the mono-tube hydraulic adjustable damper
- Investigation on thermal effect of the mono-tube hydraulic adjustable damper
- Compensation system-based regulating mechanism with grey neural network algorithm
- Adaptive and accurate control of the damping force at various working conditions
